1 SARS-CoV-2 Delta Variant Remains Viable in Environmental Biofilms found in Meat  
2 Packaging Plants

3

4 **Austin B. Featherstone<sup>1</sup>, Arnold J. T. M. Mathijssen<sup>2</sup>, Amanda Brown<sup>1§</sup> and Sapna  
5 Chitlapilly Dass<sup>1\*</sup>**

6

7 <sup>1</sup>Department of Animal Science, Texas A&M University, College Station, Texas 77845

8 <sup>2</sup> Department of Physics & Astronomy, University of Pennsylvania, 209 South 33rd Street,  
9 Philadelphia, PA 19104, USA

10 § Current address: Mammoth Biosciences, 1000 Marina Blvd, Brisbane, CA 94005

11

12

13

14

15

16

17

18

19

20

21

22

23 \* Corresponding author

24 E-mail: [sapna.dass@agnet.tamu.edu](mailto:sapna.dass@agnet.tamu.edu)

## 25 **Abstract**

26 Severe acute respiratory syndrome coronavirus 2 (SARS-CoV-2) is a coronavirus that  
27 directly infects human airway epithelial cells and caused the COVID-19 pandemic. At the start  
28 of the pandemic in 2020, meat-packaging plants saw a surge in SARS-CoV-2 cases, which  
29 forced many to temporarily close. To determine why SARS-CoV-2 appears to thrive specifically  
30 well in meat packaging plants, we used SARS-CoV-2 Delta variant and meat packaging plant  
31 drain samples to develop mixed-species biofilms on materials commonly found within meat  
32 packaging plants (stainless steel (SS), PVC, and ceramic tile). Our data provides evidence that  
33 SARS-CoV-2 Delta variant remained viable on all the surfaces tested with and without an  
34 environmental biofilm. We observed that SARS-CoV-2 Delta variant was able to remain  
35 infectious with each of the environmental biofilms, however, we detected a significant reduction  
36 in viability post-exposure to Plant B biofilm on SS, PVC, and on ceramic tile chips, and to Plant  
37 C biofilm on SS and PVC chips. The numbers of viable SARS-CoV-2 Delta viral particles was  
38 1.81 – 4.57-fold high than the viral inoculum incubated with the Plant B and Plant C  
39 environmental biofilm on SS, and PVC chips. We did not detect a significant difference in  
40 viability when SARS-CoV-2 Delta variant was incubated with the biofilm obtained from Plant A  
41 on any of the materials tested and SARS-CoV-2 Delta variant had higher plaque numbers when  
42 inoculated with Plant C biofilm on tile chips, with a 2.75-fold difference compared to SARS-  
43 CoV-2 Delta variant on tile chips by itself. In addition, we detected an increase in the biofilm  
44 biovolume in response to SARS-CoV-2 Delta variant which is also a concern for food safety due  
45 to the potential for foodborne pathogens to respond likewise when they come into contact with  
46 the virus. These results indicate a complex virus-environmental biofilm interaction which

47 correlates to the different bacteria found in each biofilm. Our results also indicate that there is the  
48 potential for biofilms to protect SARS-CoV-2 from disinfecting agents and remaining prevalent  
49 in meat packaging plants. With the highly infectious nature of some SARS-CoV-2 variants such  
50 as Delta, and more so with the Omicron variant, even a minimal amount of virus could have  
51 serious health implications for the spread and reoccurrence of SARS-CoV-2 outbreaks in meat  
52 packaging plants.

53

## 54 **Introduction**

55 Severe acute respiratory syndrome coronavirus 2 (SARS-CoV-2) belongs to the genus  $\beta$   
56 coronaviruses. In 2019, a new strain of coronavirus (SARS-CoV-2) was discovered to directly  
57 infect humans without an animal reservoir and cause a severe respiratory disease in humans  
58 called Coronavirus Disease-2019 (COVID-19) [1–3]. The first SARS-CoV-2 wild-type (WT)  
59 cases recorded in the United States were found in Washington and in Illinois in January 2020  
60 [4,5]. After the initial WT cases of SARS-CoV-2 were discovered, the virus began to mutate, and  
61 other variants began to develop across the world [6–8]. The B.1.617.2 (Delta) variant first  
62 emerged in India in late 2020/early 2021 and rapidly spread to the United Kingdom before  
63 spreading to the United States and to 60 other countries across the world [6,9,10]. The SARS-  
64 CoV-2 Delta variant is more than twice as infectious as previous variants that developed in 2020  
65 and also caused more than twice as many hospitalizations as the B.1.1.7 (Alpha) variant [10,11].

66 At the start of the COVID-19 pandemic in 2020, there was a spike in COVID-19 cases in  
67 meat packaging plants which caused many of them to temporarily close [12–14]. This could have  
68 been largely due to several environmental factors in the meat packaging plants which include air  
69 circulation of the virus via HVAC systems, the close proximity of the workers, shared equipment

70 and workspaces, shared travel and living conditions amongst the workers, and the ability of the  
71 virus to cohabitate with other biological organisms, like environmental biofilms, which are  
72 commonly found in meat packaging plants [15,16].

73 Biofilms in meat packaging plants are a major threat to food safety, as they are one of the  
74 main carriers of foodborne pathogens [17,18]. Biofilms are organized, multicellular assemblages  
75 of prokaryotic and eukaryotic cells that are enclosed in a polysaccharide matrix [19]. Biofilms  
76 can form on solid, slick surfaces such as tile flooring, PVC pipe, or on stainless steel (SS) [20–  
77 23]. Alternatively, biofilms can form on undisturbed water sources such as the inside of drains,  
78 puddles, ponds, and lakes [22,24–27]. Bacterial and fungal biofilms have so far been the focus of  
79 biofilm research in meat packaging plants [22,28–30]. However, research on the presence of  
80 virus particles in the mixed-species biofilm community is still sparse [31–33].

81 There are several factors to consider when thinking about why biofilms could be an ideal  
82 site to harbor SARS-CoV-2 in meat packaging plants. The temperature inside of meat packaging  
83 plants is maintained at 4-7°C [12,13]. SARS-CoV-2 virions are stable at colder temperatures and  
84 have been shown to persist for several days on materials commonly found in meat packaging  
85 plants such as stainless steel, copper, plastic, PVC, and cardboard [34]. Therefore, these facilities  
86 have a high risk of harboring and transmitting SARS-CoV-2 [35]. Although bacteria can not  
87 directly support virus infection, they can promote viral fitness [33,36,37]. Specifically, some  
88 viruses use components of the bacterial envelope to enhance their stability [36,38,39]. Moreover,  
89 bacterial communities and biofilms can impact the infection of mammals by viruses [33,36,40].  
90 Furthermore, from a biophysics perspective, viral stability could also be enhanced by the thin  
91 liquid film produced by bacterial biofilms [34,41].

92           There is a critical gap in knowledge in understanding the stability and infectious state of  
93 SARS-CoV-2 in multi-species biofilms, particularly those present in meat packaging plants. In  
94 this study, SARS-CoV-2 Delta variant was inoculated with- and without three different meat  
95 packaging plant environmental biofilms and incubated on SS, PVC, and ceramic tile chips at  
96 7°C. RT-qPCR was used to identify the presence of SARS-CoV-2 Delta variant during  
97 incubation, and survival was analyzed by plaque assays to assess the viability of SARS-CoV-2  
98 Delta variant on different surfaces with- and without environmental biofilms, as well as the  
99 effect viral presence had on biofilm biomass.

100           Moreover, the viability of SARS-CoV-2 Delta variant is also linked to the availability of  
101 aqueous environments, such as wet surfaces in food processing facilities. Therefore, we  
102 performed an analysis to determine how long water takes to evaporate from typical substrate  
103 materials found in food processing facilities.

104           Together, these results indicate that SARS-CoV-2 Delta variant can remain viable and  
105 spread throughout meat packaging plants.

106

107

## 108 **Results:**

109 **Mixed-species biofilm cell numbers from all three different meat packaging plants**  
110 **increased in the presence of SARS-CoV-2 Delta variant, on all surfaces tested.**

111           To determine if SARS-CoV-2 influences or hinders the growth of an environmental  
112 biofilm we grew three different biofilms that consisted of different bacterial populations found in  
113 meat packaging plant drains with and without SARS-CoV-2 Delta variant on SS (Fig. 1A), PVC

114 (Fig. 1B) and on ceramic tile chips (Fig. 1C) and incubated for five days at 7°C. The overall  
115 mean biofilm cell numbers were represented as colony forming units per mL (CFU/mL).

116 Plant A, B, and C bacteria recovered from the biofilms grown in the absence of SARS-  
117 CoV-2 Delta variant on SS chips ranged from  $1.1 \times 10^5$  to  $2.0 \times 10^6$  CFU/mL, however in the  
118 presence of SARS-CoV-2 Delta variant Biofilm A, B, and C numbers were  $5.2 \times 10^5$  to  $3.5 \times 10^6$   
119 CFU/mL (Fig. 1A, 1D, 1G). Thus a 1.58-fold increase in the biovolume in the presence of  
120 SARS-CoV-2 Delta variant on SS with biofilm organisms from Plant A, a 2.93-fold increase  
121 from Plant B, and a 2.65-fold increase from Plant C when compared to the corresponding  
122 biofilms grown on SS in the absence of SARS-CoV-2 Delta variant.

123 The bacterial numbers for biofilm from plants A, B, and C grown in the absence of  
124 SARS-CoV-2 Delta variant on PVC chips ranged from  $2.0 \times 10^4$  to  $5.3 \times 10^5$  CFU/mL, whereas  
125 the number when exposed to SARS-CoV-2 Delta variant on PVC chips ranged from  $1.0 \times 10^5$  to  
126  $4.4 \times 10^6$  CFU/mL (Fig. 1B, 1E, 1H); corresponding to a 24.69-fold increase in biovolume for  
127 organisms obtained from Plant A on PVC with SARS-CoV-2 Delta variant, a 3.09-fold increase  
128 with those from Plant B, and a 3.44-fold increase with Plant C when compared to those obtained  
129 in the absence of SARS-CoV-2 Delta variant.

130 For the biofilms grown on tile chips without SARS-CoV-2 Delta variant the CFU/mL  
131 ranged from  $2.10 \times 10^4$  to  $1.6 \times 10^6$ ; whereas in the presence of SARS-CoV-2 Delta variant  
132 ranged from  $1.0 \times 10^5$  to  $2.9 \times 10^6$  CFU/mL (Fig. 1C, 1F, 1I), representing a 1.86-fold increase in  
133 the biofilm obtained from Plant A with SARS-CoV-2 Delta variant, a 1.47-fold increase with  
134 those from Plant B, and a 3.04-fold increase with those from Plant C, compared with the  
135 biovolumes without SARS-CoV-2 Delta variant. Therefore, our data indicate that SARS-CoV-2

136 Delta variant positively influences the growth of environmental microorganisms from all three  
137 meat packaging plants on all three surfaces: SS, PVC, and ceramic tile.

138

139 **RNA levels were lower in the presence of Biofilm B, but had no significant difference for**  
140 **Biofilm A and C.**

141 To determine whether meat packaging plant biofilms provide a conducive environment  
142 for SARS-CoV-2 Delta, we performed RT-qPCR analyses targeting the nucleocapsid gene (N) of  
143 SARS-CoV-2 Delta variant on the harvested samples from biofilms from Plant A, B, and C  
144 grown on SS, PVC, and ceramic tile chips, with and without SARS-CoV-2 Delta. We also tested  
145 SARS-CoV-2 Delta variant without biofilm organisms on the same surfaces and same incubation  
146 conditions. Our RT-qPCR data revealed that there was no statistical significance in the  
147 persistence of SARS-CoV-2 Delta variant RNA when a mixed species biofilm from Plant A or C  
148 was present (Fig. 2A-2C and Fig. 2G-2I), however, we did detect a significant decrease in N-  
149 gene copy number when SARS-CoV-2 Delta variant was mixed with an environmental biofilm  
150 organisms from Plant B on all of the materials tested (Fig. 2D-2F).

151 When tested on SS the average gene copy numbers for the N-gene for in the presence of  
152 SARS-CoV-2 Delta variant was 7.24 gene copies/ $\mu$ L for Plant A, 5.87 gene copies/ $\mu$ L for Plant  
153 B, and 7.38 gene copies/ $\mu$ L for Plant C, whereas for SARS-CoV-2 Delta variant by itself on SS  
154 chips was 7.47 gene copies/ $\mu$ L for Biofilm A, 6.96 gene copies/ $\mu$ L for Biofilm B, and 7.65 gene  
155 copies/ $\mu$ L for Biofilm C (Fig. 2A, 2D, and 2G).

156 The average gene copy numbers for the N-gene for biofilms grown with SARS-CoV-2  
157 Delta variant on PVC chips was 7.19 gene copies/ $\mu$ L for Plant A, 6.27 gene copies/ $\mu$ L for Plant  
158 B, and 7.18 gene copies/ $\mu$ L for Plant C, whereas the gene copy numbers for SARS-CoV-2 Delta

159 variant – Biofilm on PVC was 7.49 gene copies/ $\mu$ L for Biofilm A, 7.29 gene copies/ $\mu$ L for  
160 Biofilm B, and 7.47 gene copies/ $\mu$ L for Biofilm C (Fig. 2B, 2E, and 2H).

161 The average N-gene copy numbers for biofilms grown in the presence of SARS-CoV-2  
162 Delta variant on ceramic tile chips was 6.93 gene copies/ $\mu$ L for Plant A, 6.27 gene copies/ $\mu$ L for  
163 Plant B, and 7.16 gene copies/ $\mu$ L for Plant C, whereas the gene copy numbers for SARS-CoV-2  
164 Delta variant – Biofilm on ceramic tile chips was 7.12 gene copies/ $\mu$ L for Biofilm A, 7.34 gene  
165 copies/ $\mu$ L for Biofilm B, and 7.44 gene copies/ $\mu$ L for Biofilm C. These results indicate that  
166 SARS-CoV-2 Delta variant RNA was significantly degraded when mixed with environmental  
167 biofilm organism from Plant B on SS, PVC, and ceramic tile chips compared to when SARS-  
168 CoV-2 Delta variant was exposed to SS, PVC, and ceramic tile chips in the absence of biofilm.  
169 However, we did not detect a significant reduction in the SARS-CoV-2 Delta variant RNA when  
170 inoculated with Biofilm A and C on SS, PVC, and on ceramic tile chips.

171

172 **SARS-CoV-2 Delta variant survival was significantly inhibited in the presence of Biofilm B**  
173 **on all surface materials and on Biofilm C on SS and PVC chips.**

174 Whilst RT-qPCR analyses is a useful method to identify the presence of an RNA gene  
175 target quantitatively, it does not provide any information on the viability of the virus. Therefore,  
176 to identify whether SARS-CoV-2 Delta variant was able to survive and remain infectious when  
177 incubated with environmental biofilms, we performed plaque assays to quantitatively analyze the  
178 number of infectious virus particles recovered after incubation on the three different surface  
179 materials that we tested in this study with and without an environmental biofilm. In short,  $1 \times 10^4$   
180 virus particles were inoculated onto surface materials with and without environmental biofilm  
181 organisms, and viral infectivity was measured using a solid double overlay plaque assay. For all



182 the materials tested, a significantly lower average plaque forming units (PFU)/mL was detected  
183 in the presence of biofilm organisms from Plant B. Lower average PFUs were also observed  
184 when the virus was incubated with the biofilm organism from Plant C on SS and PVC chips (Fig.  
185 3D - 3H).

186 The average PFU/mL for SARS-CoV-2 Delta variant incubated with biofilm organism on  
187 SS chips was  $1.73 \times 10^4$  PFU/mL for Plant A,  $4.67 \times 10^3$  PFU/mL for Plant B, and 683 PFU/mL  
188 for Plant C, whereas the average PFU/mL for Biofilm – SARS-CoV-2 Delta variant on SS chips  
189 was 16,167 PFU/mL for Biofilm A, 21,333 PFU/mL for Biofilm B, and 1,633 PFU/mL for  
190 Biofilm C (Fig. 3A, 3D, and 3G). For SS chips there was no significant difference between the  
191 PFU/mL for SARS-CoV-2 incubated to- or without biofilm organisms from Plant A, however,  
192 there was a 4.57-fold reduction in infectious SARS-CoV-2 Delta variant when exposed to  
193 biofilm organism from Plant B, and a 2.39-fold reduction in infectious SARS-CoV-2 Delta  
194 variant after exposure to biofilm organisms from Plant C.

195 Similarly, SARS-CoV-2 Delta variant on exposed to biofilm on PVC chips gave  $1.32 \times$   
196  $10^5$  PFU/mL for Plant A,  $5.67 \times 10^3$  PFU/mL for Plant B, and 267 PFU/mL for Biofilm C,  
197 whereas the average PFU/mL for SARS-CoV-2 Delta variant - Biofilm was 128,333 PFU/mL for  
198 Biofilm A, 19,667 PFU/mL for Biofilm B, and 483 PFU/mL for Biofilm C (Fig 3B, 3E, and 3H).  
199 For PVC chips there was no significant difference between the PFU/mL for SARS-CoV-2 Delta  
200 variant exposed to- and without biofilm forming organisms from Plant A, however, there was a  
201 3.47-fold reduction in infectious SARS-CoV-2 Delta variant when exposed to the biofilm  
202 organisms from Plant B, and a 1.81-fold reduction in PFU when incubated with organism from  
203 Plant C.

204           When incubated on tile chips the average PFU/mL for SARS-CoV-2 Delta variant  
205 exposed to biofilm forming organisms was  $4.83 \times 10^3$  PFU/mL for Plant A, 267 PFU/mL for  
206 Plant B, and  $5 \times 10^3$  PFU/mL for Plant C, whereas the average PFU/mL for SARS-CoV-2 Delta  
207 variant – Biofilm was 5,333 PFU/mL for Biofilm A, 483 PFU/mL for Biofilm B, and 1,817  
208 PFU/mL for Biofilm C (Fig 3C, 3F, and 3I). For the ceramic tile chips there was again no  
209 significant difference between the PFU/mL for SARS-CoV-2 Delta variant incubated with- and  
210 without biofilm forming organism from Plant A, however, there was a 2.62-fold reduction in  
211 PFU/mL after exposure to the biofilm forming organisms from Plant B, and a 2.75-fold increase  
212 in infectious SARS-CoV-2 Delta after exposure to the biofilm organisms from Plant C,  
213 compared with virus incubated alone. These results indicate that SARS-CoV-2 Delta variant had  
214 no significant reduction in infectivity when mixed with organisms from Plant A when incubated  
215 on all the test materials. However, there was a significant reduction in infectivity of SARS-CoV-  
216 2 Delta variant when exposed to the biofilm forming organisms from Plant B on all of the  
217 materials tested. Plant C organisms showed a significant effect on reducing SARS-CoV-2 Delta  
218 variant infectivity when incubated on SS and PVC chips, but was able to offer SARS-CoV-2  
219 protection when incubated on tile chips, so that viability was higher than that obtained when the  
220 virus was incubated by itself.

221

## 222 **Evaporation dynamics for different substrate materials in meat processing facilities.**

223           To examine the availability of aqueous environments for SARS-CoV-2 Delta variant to  
224 survive in meat processing facilities, we performed an analysis to determine how long liquid  
225 takes to evaporate from typical substrates found in such facilities. We measured the evaporation  
226 rates from stainless steel (red, circles), PVC (green, diamonds) and ceramic tile (blue, triangles)

227 samples. Fig 5(A) shows the weight-fraction of liquid remaining on each of these substrates as a  
228 function of time (hours) post inoculation. These data points suggest that water evaporates faster  
229 from stainless steel compared to PVC and ceramic tiles. To quantify this, we performed a least-  
230 square fitting analysis to an exponential decay function to determine the half-life time of the  
231 liquid on each of these substrates. Fig 5(B) shows these half-life times, giving  $88 \pm 9$  hours for  
232 stainless steel,  $110 \pm 16$  hours for PVC, and  $127 \pm 10$  hours for ceramic tile. Thus, the PVC and  
233 ceramic tiles provide a more stable aqueous environment for SARS-CoV-2 Delta variant to  
234 remain viable longer compared to stainless steel.

235

## 236 **Discussion**

237 At the start of the SARS-CoV-2 pandemic in 2020, many meat packaging plants had to  
238 be closed due to the high number of SARS-CoV-2 cases amongst the workers [13,42–44]. These  
239 closures created a bottleneck in the supply chain between the livestock producers, feedlot  
240 operators, and the processors. To determine why SARS-CoV-2 had a high occurrence rate in  
241 meat packaging plants, we investigated if SARS-CoV-2 Delta variant could survive within meat  
242 packaging plant biofilms as a potential mechanism for SARS-CoV-2 endurance and persistence.  
243 We demonstrated in this study that SARS-CoV-2 Delta variant was able to remain viable for up  
244 to five days post-inoculation on SS, PVC, and on tile chips with- and without environmental  
245 biofilms from three different meat packaging plants. Therefore, meat packaging plants are at a  
246 high risk of harboring SARS-CoV-2 and spreading the virus amongst the workers in these  
247 facilities.

248 In addition to meat packaging plants being a conducive environment for SARS-CoV-2 to  
249 survive and disseminate, meat packaging plants are also an opportune environment for

250 environmental biofilms. Environmental biofilms in meat packaging plants can be a source of  
251 foodborne pathogen outbreaks that are a serious threat to food safety and human health [20,22].  
252 Biofilms can develop on a wide range of diverse surfaces throughout the meat packaging plant  
253 such as floors, drains, and areas that are hard to reach and do not come into contact with surface  
254 sanitizer very often [24,45]. The protective matrix of the biofilm can also offer shelter to  
255 organisms within the biofilm from the effects of disinfecting agents.

256 Biofilms have been suggested to act as a reservoir for the survival and spread of other  
257 viruses, such as noroviruses [32,33,36,46,47]. In this study, we utilized floor drain samples that  
258 were collected from different meat packaging plants to identify the viability of SARS-CoV-2  
259 Delta variant with- and without an environmental biofilm on several common materials found in  
260 meat packaging plants: SS, PVC, and tile chips. We observed that SARS-CoV-2 Delta variant  
261 can remain not just detectable but also viable on all of the materials tested (Fig. 2 & Fig. 3). We  
262 also observed that the viability of the virus on each material tested was not significantly different  
263 with and without biofilm forming organisms from Plant A, however, the viability of the virus  
264 was reduced in the presence of organisms from Plant B on each material tested and for Plant C  
265 on stainless steel and on PVC chips (Fig. 2 & Fig. 3).

266 The viability of SARS-CoV-2 in the environmental biofilm was detected via a solid  
267 double overlay plaque assay to identify the number of infectious virus particles and via RT-  
268 qPCR to quantifiably detect viral RNA on each material tested compared to SARS-CoV-2 Delta  
269 variant inoculated on the materials by itself (Fig. 2 and Fig. 3). The RT-qPCR data suggests that  
270 most of the SARS-CoV-2 Delta variant mixed with biofilm was from non-viable or inactive virus  
271 since the plaque assay data differed considerably (Fig. 2 and Fig. 3). The PFU/mL for SARS-  
272 CoV-2 Delta variant – Biofilm B or C on stainless steel or PVC chips indicated a 46.88 – 207.04-

273 fold reduction of infectious SARS-CoV-2 Delta variant virus particles compared to the initial  
274 titer of the virus ( $1.0 \times 10^5$  PFU/mL) after incubating on the different materials for five days at  
275 7°C. However, when SARS-CoV-2 Delta variant was mixed with biofilm forming organisms  
276 from Plants B and C and inoculated on SS or PVC chips, we observed a 146.41 – 374.53-fold  
277 reduction in infectivity compared to the original titer of the virus ( $1.0 \times 10^5$  PFU/mL). We did not  
278 detect a significant reduction in infectivity for SARS-CoV-2 Delta variant exposed to organisms  
279 from Plant A on SS, PVC, or on ceramic tile chips.

280 Our plaque assay studies indicated that SARS-CoV-2 Delta variant was able to remain  
281 infectious when mixed with biofilm forming organism from Plants A, B, and C on SS, PVC, and  
282 on ceramic tile chips for five days at 7°C (Fig. 3). SARS-CoV-2 Delta variant was more  
283 infectious following incubation on SS and PVC chips after exposure to biofilm forming  
284 organisms from Plants A & B, compared the equivalent PFUs after incubation on tile chips.  
285 After exposure to the biofilm forming organisms from Plant C, SARS-CoV-2 Delta variant was  
286 more infectious on tile chips than SS, and then more viable on SS when compared to PVC chips.  
287 Interestingly, SARS-CoV-2 Delta variant showed higher viability after exposure to the biofilm  
288 organisms from Plant C on tile chips, than when it was incubated on tile chip alone. Even a  
289 modest amount of virus survival in the meat packaging plant could be a health risk for the  
290 transmission and spread of SARS-CoV-2 within the meat packaging plant.

291 These results suggest that the viability of SARS-CoV-2 Delta variant is highly dependent  
292 on the microorganisms that are present within each biofilm. Previous work on the population  
293 structures for the biofilms obtained from the different plants has shown that Plant A is composed  
294 of xxx....

295

296

297           One of the most surprising results from our study was the increase in biofilm biovolume  
298 for all three biofilms in the presence of SARS-CoV-2 Delta variant, ranging from a 1.47 – 24.69-  
299 fold increase compared to when the biofilms were inoculated without virus on all of the materials  
300 tested (Fig. 1). These results correlate with what others have previously shown, in that virus  
301 particles can enhance the biovolume of the biofilm [32,33,46]. In nature, bacteria interact with  
302 eukaryotes and other prokaryotes, fighting for survival through synergistic, mutualistic, and  
303 antagonistic interactions [18,32,33,36,46]. The increase in biovolume could be linked to the virus  
304 triggering a defense mechanism in the bacteria which results in the bacteria increasing their  
305 biovolume so it can expand in the presence of the virus (Fig. 1). This result is critical in  
306 elucidating the interactions between the bacteria and virus and how they can potentially work  
307 together and react to one another.

308           In the evaporation dynamics assays, we examined how the viability of SARS-CoV-2  
309 Delta variant is linked to the availability of aqueous environments, such as wet surfaces in food  
310 processing facilities. We quantified how long liquid can be retained on commonly found  
311 substrate materials in food processing facilities, including stainless steel, PVC, and ceramic tiles.  
312 Our results indicate that water evaporates faster from stainless steel compared to PVC and tile  
313 chips. Hence, the latter two provide more favorable conditions for the virus.

314           Our results indicate that SARS-CoV-2 Delta variant can remain viable for up to five days  
315 within each biofilm from three different meat packaging plants. Our conclusions suggest that  
316 SARS-CoV-2 could easily spread among the workers in the meat packaging plant, remaining  
317 viable on SS, PVC, and on ceramic tile chips. We observed that SARS-CoV-2 Delta variant was,  
318 for the most part, more viable in the absence of biofilm, but was able to remain infectious in the

319 presence of biofilm. Our data suggests that wash-water carrying SARS-CoV-2 could seep into  
320 the drains of the meat packaging plant and the virus remain viable in the drainage system,  
321 interacting with biofilm forming organisms. Biofilms could potentially facilitate the survival of  
322 SARS-CoV-2 throughout the facility through several active processes, such as the virus binding  
323 to the biofilm polysaccharide matrix, preventing desiccation and exposure to sanitizing agents.  
324 The biofilm could also help to spread the virus through bacterial motility; the bacteria can also  
325 undergo swarming, which would allow the virus to potentially move outwards as the biofilm  
326 develops new extracellular matrices, spreading across the meat packaging plant through the drain  
327 systems [22,33,48,49]. It is well documented that SARS-CoV-2 can spread through aerosols  
328 [2,3,5,50]. In addition, another method for how SARS-CoV-2 can spread throughout the meat  
329 packaging plant would be from when the floors are washed with high-pressure water. When the  
330 high-pressured water hits the drain system, it is possible that the water can disrupt the biofilm  
331 containing the virus creating aerosols that then spread throughout the facility. Once airborne, the  
332 HVAC system in the meat packaging plant and the colder temperature can facilitate the survival  
333 and distribution of SARS-CoV-2 throughout the facility, which is in agreement with current fluid  
334 mechanic models [51].

335           Our findings in this study have led us to conclude that the viability of the SARS-  
336 CoV-2 Delta variant with and without the biofilms, the survival on surfaces at 7°C, current  
337 models of spread via HVAC systems, and fluid mechanics models all provide evidence for the  
338 long-term survival and spread of SARS-CoV-2 in meat packaging plants. These findings, along  
339 with the close working quarters, shared equipment, and shared travel to and from the meat  
340 packaging plant all provide an environment where SARS-CoV-2 can be rapidly transmitted.  
341 Continued studies on the survival and dispersal of SARS-CoV-2 in meat packaging plants will

342 hopefully provide new details that can inform and help reduce the spread of SARS-CoV-2 and  
343 other pathogens within these environments.

344

345

## 346 **Conclusions**

347 Our data provides evidence that SARS-CoV-2 Delta variant can persist and remain viable  
348 with- and without environmental biofilms found in meat packaging plants under the typical  
349 environmental conditions found in meat packaging plants. We identified a difference in viral  
350 viability that was dependent on the microbial structure and make-up of the biofilms tested. These  
351 results suggest that biofilms could act as a reservoir for SARS-CoV-2 Delta variant to persist and  
352 spread throughout meat packaging plants. The results from this study provide evidence for why  
353 high numbers of cases of COVID-19 have occurred in in meat packaging plants. Our CFU results  
354 provide evidence that SARS-CoV-2 Delta variant stimulates the bacteria found in the  
355 environmental biofilms, resulting in an increase to their biovolumes. Future work will need to be  
356 conducted to understand the biological interactions between the virus and biofilm, such as the  
357 protein-protein interactions between the virus and bacteria, positional virus survival within the  
358 biofilm, bacterial quorum sensing of the virus, and transcriptomics within each biofilm  
359 population to understand which genes are being upregulated and downregulated, and if different  
360 species respond in different manners, in the presence of SARS-CoV-2 Delta variant. Altogether,  
361 this work will help in understanding viral and bacterial interactions, allowing for the design of  
362 intervention strategies to help prevent future bacterial and viral outbreaks from occurring in meat  
363 packaging plants.

364



## 365 **Materials and Methods:**

### 366 **Drain sample collection and characterization**

367 The meat packaging plant floor drain biofilm samples were collected from three different  
368 meat processing plants, following the previously described protocol [22] and were generously  
369 provided for this study by Drs. Mick Bosilivac and Rong Wang USDA-ARS-USMARC, Clay  
370 Center, Nebraska.

371

### 372 **Cell lines and SARS-CoV-2 propagation**

373 Vero CCL-81 cells (ATCC® CCL-81) were used for the propagation of SARS-CoV-2  
374 viral particles and for the solid double overlay plaque assays. Vero CCL-81 cells used in this  
375 study were cultured at 37°C in 5% CO<sub>2</sub> in Dulbecco's modified Eagle medium (DMEM;  
376 Cellgro) supplemented with 10% fetal bovine serum (FBS), penicillin (50 IU/mL), and  
377 streptomycin (50 µg/mL). SARS-CoV-2 Delta variant was used for all of the experiments in this  
378 study and was acquired from the ATCC (ATCC NR-55672, hCoV-19/USA/MD-HP05647/2021  
379 Delta, batch number: 70046635). The virus stocks used for this study were produced as  
380 previously described (31).

381

### 382 **Assay of SARS-CoV-2 infectivity**

383 Viral infectivity was determined by titrating viral stock onto cultured Vero CCL-81 cells  
384 and a solid double overlay plaque assay was performed as previously described [52]. The SARS-  
385 CoV-2 viral titer used for all experiments was  $1.0 \times 10^5$  PFU/mL.

386 For the recovered samples 300 µL of each homogenate was filtered through a 0.45 µm  
387 syringe filter to remove bacterial contaminants before being serially diluted in DMEM with 2%

388 FBS and 1% Streptomycin/Penicillin mix. Each sample was plated onto cultured Vero CCL-81  
389 cells in duplicate. Results from this experiment are the mean values and standard deviations  
390 (error bars) from three independent experiments. A previously published protocol was followed  
391 for the solid double overlay plaque assay [52].

392

### 393 **Biofilm formation with drain sample and SARS-CoV-2**

394 SARS-CoV-2 stocks were cultured to a viral titer of  $1.0 \times 10^5$  PFU/mL prior to the start  
395 of the experiment and stored at  $-80^\circ\text{C}$  [53]. To simulate the meat packaging plant environment,  
396 floor drain samples were 50-fold inoculated into Lennox Broth without salt medium (LB-NS,  
397 Acumedia Manufacturers, Baltimore, MD) and incubated at  $7^\circ\text{C}$  for 5 days with orbital shaking  
398 at 200 rpm [53]. On the fifth day, a 1.0 mL aliquot was removed from each sample, diluted in  
399 sterile LB-NS medium, and plated onto Trypticase soy agar (TSA) plates for colony enumeration  
400 after overnight incubation at  $37^\circ\text{C}$ . To investigate whether biofilm formation from meat  
401 packaging plant floor drain samples can support the harborage of SARS-CoV-2, biofilms with or  
402 without SARS-CoV-2 Delta variant on SS, PVC, and ceramic tile (Fig. 3). Controls included  
403 SARS-CoV-2 Delta variant alone (no biofilm) and a media only negative control. The  
404 experiments were set-up in duplicate in 6-well plates, and repeated three times, to give a total of  
405 six data points for each assay condition. Each well contained one sterile (18x18x2mm) SS, PVC,  
406 or ceramic tile chip. The following test combinations were added to the top facing surface of  
407 each chip: (A) Biofilm with SARS-CoV-2 Delta variant: 100  $\mu\text{L}$  of the 5-day floor drain pre-  
408 culture (described above) mixed with 100  $\mu\text{L}$  of SARS-CoV-2 Delta variant in DMEM and 100  
409  $\mu\text{L}$  of LB-NS media; (B) Biofilm without SARS-CoV-2 Delta variant: 100  $\mu\text{L}$  of the five-day  
410 biofilm pre-culture, 100  $\mu\text{L}$  of DMEM, and 100  $\mu\text{L}$  of LB-NS media; (C) SARS-CoV-2 Delta

411 variant alone (no biofilm): 100  $\mu$ L of SARS-CoV-2 Delta variant ( $1 \times 10^4$ ) in DMEM and 100  
412  $\mu$ L of LB-NS media; (D) Media only control: 100  $\mu$ L of DMEM and 200  $\mu$ L of LB-NS. Each  
413 experimental variable was incubated at 7°C for five days.

414 At the end of the incubation period, biofilm biomass/virus was harvested from each chip  
415 by lifting the chip with sterile forceps, scraping the material on both sides with a sterile cell  
416 scraper into a sterile tube and rinsing the chip with 1 mL of LB-NS, which was also collected  
417 (Fig 4). The collected sample was homogenized by pipetting. The drain biofilm biomass was  
418 determined by taking 100  $\mu$ L of the homogenate, performing 10-fold dilutions into LB-NS and  
419 plating on TSA plates for colony enumeration following an overnight incubation at 37°C. The  
420 remaining homogenate was used for RT-qPCR and plaque assay analysis. Results from this  
421 experiment are the mean values and standard deviations (error bars) from three independent  
422 experiments, run in duplicate.

423

#### 424 **SARS-CoV-2 RT-qPCR Analysis**

425 Viral RNA from each sample was extracted and purified to perform RT-qPCR to  
426 determine the relative copy numbers of SARS-CoV-2 Delta variant in each sample. Viral RNA  
427 was extracted and purified using Zymo's Quick-DNA/RNA Viral Magbead Extraction kit along  
428 with a Thermo Scientific Kingfisher Flex machine. Purified RNA samples were quantified by  
429 using a SpectroStar Nano spectrophotometer. Purified RNA samples were stored at -20°C.  
430 Taqman-based RT-qPCR analyses were completed using NEB's Luna<sup>®</sup> Universal Probe One-  
431 Step RT-qPCR kit. Purified RNA extracted from SARS-CoV-2 Delta variant was used for the  
432 positive control and to create a standard curve. The RT-qPCR reactions were completed in 25  $\mu$ L  
433 volumes using the Luna Universal Probe One-Step Reaction Mix. The RT-qPCR mixture

434 contained 10  $\mu$ L of Luna Universal Probe One-Step Reaction Mix, 1  $\mu$ L of Luna WarmStart RT  
435 Enzyme Mix, 400 nM of nCOV\_N1 Forward Primer (IDT Catalog #10006821), 400 nM of  
436 nCOV\_N1 Reverse Primer (IDT Catalog #10006822), 200 nM of nCOV\_N1 probe (IDT Catalog  
437 #10006823), 250 ng RNA, and nuclease free water. The RT-qPCR analysis was performed using  
438 a Bio-Rad CFX96 Deep Well Real Time thermal cycler. Reverse transcription occurred at 55°C  
439 for 10 minutes, after which there was denaturation and *Taq* polymerase activation at 95°C for 1  
440 minute, and then 40 cycles at 95°C for 15 seconds followed by 60°C for 30 seconds for data  
441 collection. RT-qPCR reactions were performed in duplicate for each sample and the sample  
442 threshold cycle (CT) was used for data analysis. Gene copy numbers were calculated by  
443 comparing the CT value for 250 ng SARS-CoV-2 Delta variant on the standard curve, with the  
444 CT value for each sample. The following equation was used to calculate the gene copy numbers  
445 for the N-gene of SARS-CoV-2 Delta variant: Gene Copy Number = (Copy Number of 250 ng  
446 of positive control) - ((CT Pos Cont. - CT exp cont)/CT exp cont)\*(Copy number of 250 ng of  
447 positive control)[54]. Data from each sample was compared using positive and negative controls  
448 performed in duplicate. Results from this experiment are the mean value and standard deviation  
449 (error bars) from three independent experiments (Fig. 2).

450

#### 451 **Evaporation dynamics assays.**

452 We performed an analysis to determine how long liquid takes to evaporate from typical  
453 substrates found in meat processing facilities, to examine the availability of aqueous  
454 environments for SARS-CoV-2 to survive in these facilities. We measured the evaporation rates  
455 from fixed-size samples of stainless steel, PVC, and ceramic tile. These substrates were  
456 inoculated with a calibrated amount of culture media, after which the weight of the samples plus

457 the remaining media was measured with a high-precision balance at time points of 0, 1, 3, 6, 9,  
458 24, 30, 48, 72, 96, and 120 hpi. For each substrate type, we performed N=6 replicates. From  
459 these measurements, we determine the fraction (percentage/100) of weight of the media  
460 remaining on the substrates, compared to the initial weight of the media at 0 hpi. These results  
461 are shown in Figure 5. Panel (A) shows this weight fraction,  $f(t)$ , as a function of time post  
462 inoculation,  $t$ . The data points and error bars represent the mean and standard error of these  
463 replicates, respectively. For each substrate, we then performed a least-squares fit analysis of the  
464 data to an exponential decay function,  $f(t) = \exp(-t/\tau)$ , where  $\tau$  is the half-life time of the  
465 media. Panel (B) shows these half-life times for the three substrates, where the error bars again  
466 represents the standard error of the ensemble of replicates.

467

468

#### 469 **Acknowledgements:**

470 The authors would like to thank USDA-NIFA 2020-67015-32330 grant for support of  
471 this study. We would like to thank Drs. Mick Bosilivac and Rong Wang (USDA-ARS-UAMRC,  
472 Clay Center-Nebraska) for providing meat packaging plant biofilms, and Dr. Ben Neuman  
473 (Texas A&M) for providing the original stocks of SARS-CoV-2 Delta variant for our study.

474

#### 475 **References**

- 476 1. Cucinotta D, Vanelli M. WHO Declares COVID-19 a Pandemic. *Acta Biomed.* 2020;91:  
477 157–160. doi:10.23750/ABM.V91I1.9397
- 478 2. Hu B, Guo H, Zhou P, Shi ZL. Characteristics of SARS-CoV-2 and COVID-19. *Nat Rev*  
479 *Microbiol* 2020 193. 2020;19: 141–154. doi:10.1038/s41579-020-00459-7

- 480 3. Deng X, Garcia-Knight MA, Khalid MM, Servellita V, Wang C, Morris MK, et al.  
481 Transmission, infectivity, and antibody neutralization of an emerging SARS-CoV-2  
482 variant in California carrying a L452R spike protein mutation. medRxiv. 2021;  
483 doi:10.1101/2021.03.07.21252647
- 484 4. Holshue ML, DeBolt C, Lindquist S, Lofy KH, Wiesman J, Bruce H, et al. First Case of  
485 2019 Novel Coronavirus in the United States. *N Engl J Med*. 2020;382: 929–936.  
486 doi:10.1056/NEJMOA2001191/SUPPL\_FILE/NEJMOA2001191\_DISCLOSURES.PDF
- 487 5. Ghinai I, McPherson TD, Hunter JC, Kirking HL, Christiansen D, Joshi K, et al. First  
488 known person-to-person transmission of severe acute respiratory syndrome coronavirus 2  
489 (SARS-CoV-2) in the USA. *Lancet*. 2020;395: 1137–1144. doi:10.1016/S0140-  
490 6736(20)30607-3/ATTACHMENT/4A7D867D-89EA-4355-B2D6-  
491 F40AF12DF2BF/MMC1.PDF
- 492 6. Ferreira IATM, Kemp SA, Datir R, Saito A, Meng B, Rakshit P, et al. SARS-CoV-2  
493 B.1.617 Mutations L452R and E484Q Are Not Synergistic for Antibody Evasion. *J Infect*  
494 *Dis*. 2021;224: 989–994. doi:10.1093/INFDIS/JIAB368
- 495 7. Singh D, Yi S V. On the origin and evolution of SARS-CoV-2. *Exp Mol Med*. 2021;53:  
496 537–547. doi:10.1038/s12276-021-00604-z
- 497 8. Cherian S, Potdar V, Jadhav S, Yadav P, Gupta N, Das M, et al. SARS-CoV-2 Spike  
498 Mutations, L452R, T478K, E484Q and P681R, in the Second Wave of COVID-19 in  
499 Maharashtra, India. *Microorganisms*. 2021;9: 1542.  
500 doi:10.3390/MICROORGANISMS9071542
- 501 9. Del Rio C, Malani PN, Omer SB. Confronting the Delta Variant of SARS-CoV-2,  
502 Summer 2021. *JAMA*. 2021;326: 1001–1002. doi:10.1001/JAMA.2021.14811

- 503 10. Mlcochova P, Kemp S, Dhar MS, Papa G, Meng B, Ferreira IATM, et al. SARS-CoV-2  
504 B.1.617.2 Delta variant replication and immune evasion. *Nature*. 2021;599: 114–119.  
505 doi:10.1038/s41586-021-03944-y
- 506 11. Twohig KA, Nyberg T, Zaidi A, Thelwall S, Sinnathamby MA, Aliabadi S, et al. Hospital  
507 admission and emergency care attendance risk for SARS-CoV-2 delta (B.1.617.2)  
508 compared with alpha (B.1.1.7) variants of concern: a cohort study. *Lancet Infect Dis*.  
509 2022;22: 35–42. doi:10.1016/S1473-3099(21)00475-8/ATTACHMENT/23916340-7FD4-  
510 46D7-B32C-58C898ACABE9/MMC1.PDF
- 511 12. Pokora R, Kutschbach S, Weigl M, Braun D, Epple A, Lorenz E, et al. Investigation of  
512 superspreading COVID-19 outbreak events in meat and poultry processing plants in  
513 Germany: A cross-sectional study. *PLoS One*. 2021;16: e0242456.  
514 doi:10.1371/JOURNAL.PONE.0242456
- 515 13. Taylor CA, Boulos C, Almond D. Livestock plants and COVID-19 transmission. *Proc*  
516 *Natl Acad Sci U S A*. 2020;117: 31706–31715. doi:10.1073/PNAS.2010115117/-  
517 /DCSUPPLEMENTAL
- 518 14. Waltenburg MA, Victoroff T, Rose CE, Butterfield M, Jarvis RH, Fedak KM, et al.  
519 Update: COVID-19 Among Workers in Meat and Poultry Processing Facilities — United  
520 States, April–May 2020. *MMWR Morb Mortal Wkly Rep*. 2022;69: 887–892.  
521 doi:10.15585/MMWR.MM6927E2
- 522 15. Zhang R, Li Y, Zhang AL, Wang Y, Molina MJ. Identifying airborne transmission as the  
523 dominant route for the spread of COVID-19. *Proc Natl Acad Sci U S A*. 2020;117:  
524 14857–14863. doi:10.1073/PNAS.2009637117/-/DCSUPPLEMENTAL
- 525 16. Coronavirus: “Circulating air” may have spread COVID-19 to 1,500 German meat plant

- 526 staff. In: Sky News [Internet]. 2020 [cited 18 Jan 2022]. Available:  
527 [https://news.sky.com/story/coronavirus-circulating-air-may-have-spread-covid-19-to-1-](https://news.sky.com/story/coronavirus-circulating-air-may-have-spread-covid-19-to-1-500-german-meat-plant-staff-12014156)  
528 [500-german-meat-plant-staff-12014156](https://news.sky.com/story/coronavirus-circulating-air-may-have-spread-covid-19-to-1-500-german-meat-plant-staff-12014156)
- 529 17. Pinto M, Langer TM, Hüffer T, Hofmann T, Herndl GJ. The composition of bacterial  
530 communities associated with plastic biofilms differs between different polymers and  
531 stages of biofilm succession. PLoS One. 2019;14: e0217165.  
532 doi:10.1371/JOURNAL.PONE.0217165
- 533 18. Zupančič J, Raghupathi PK, Houf K, Burmølle M, Sørensen SJ, Gunde-Cimerman N.  
534 Synergistic interactions in microbial biofilms facilitate the establishment of opportunistic  
535 pathogenic fungi in household dishwashers. Front Microbiol. 2018;9: 21.  
536 doi:10.3389/FMICB.2018.00021/BIBTEX
- 537 19. Donlan RM. Biofilms: Microbial Life on Surfaces. Emerg Infect Dis. 2002;8: 881.  
538 doi:10.3201/EID0809.020063
- 539 20. Chitlapilly Dass S, Wang R. Biofilm through the Looking Glass: A Microbial Food Safety  
540 Perspective. Pathog (Basel, Switzerland). 2022;11: 346.  
541 doi:10.3390/PATHOGENS11030346
- 542 21. Nakanishi EY, Palacios JH, Godbout S, Fournel S. Interaction between Biofilm  
543 Formation, Surface Material and Cleanability Considering Different Materials Used in Pig  
544 Facilities—An Overview. Sustain. 2021;13: 5836. doi:10.3390/SU13115836
- 545 22. Chitlapilly Dass S, Bosilevac JM, Weinroth M, Elowsky CG, Zhou Y, Anandappa A, et  
546 al. Impact of mixed biofilm formation with environmental microorganisms on *E. coli*  
547 O157:H7 survival against sanitization. npj Sci Food. 2020;4: 16. doi:10.1038/S41538-  
548 020-00076-X



- 549 23. Rogers J, Dowsett AB, Dennis PJ, Lee J V., Keevil CW. Influence of Plumbing Materials  
550 on Biofilm Formation and Growth of *Legionella pneumophila* in Potable Water Systems.  
551 Appl Environ Microbiol. 1994;60: 1842. doi:10.1128/aem.60.6.1842-1851.1994
- 552 24. Donlan RM. Biofilms: microbial life on surfaces. Emerg Infect Dis. 2002;8: 881–890.  
553 doi:10.3201/EID0809.020063
- 554 25. Lee LM, Rosenberg G, Rubinstein SM. A sequence of developmental events occurs  
555 underneath growing *Bacillus subtilis* pellicles. Front Microbiol. 2019;10: 842.  
556 doi:10.3389/FMICB.2019.00842/BIBTEX
- 557 26. Mathijssen AJTM, Shendruk TN, Yeomans JM, Doostmohammadi A. Upstream  
558 Swimming in Microbiological Flows. Phys Rev Lett. 2016;116: 028104.  
559 doi:10.1103/PHYSREVLETT.116.028104/FIGURES/4/MEDIUM
- 560 27. Balcázar JL, Subirats J, Borrego CM. The role of biofilms as environmental reservoirs of  
561 antibiotic resistance. Front Microbiol. 2015;6: 1216.  
562 doi:10.3389/FMICB.2015.01216/BIBTEX
- 563 28. Ghafir Y, China B, Dierick K, De Zutter L, Daube G. A seven-year survey of  
564 *Campylobacter* contamination in meat at different production stages in Belgium. Int J  
565 Food Microbiol. 2007;116: 111–120. doi:10.1016/J.IJFOODMICRO.2006.12.012
- 566 29. Jessen B, Lammert L. Biofilm and disinfection in meat processing plants. Int Biodeterior  
567 Biodegradation. 2003;51: 265–269. doi:10.1016/S0964-8305(03)00046-5
- 568 30. Bakhtiary F, Sayevand HR, Remely M, Hippe B, Hosseini H, Haslberger AG. Evaluation  
569 of Bacterial Contamination Sources in Meat Production Line. J Food Qual. 2016;39: 750–  
570 756. doi:10.1111/JFQ.12243
- 571 31. Storey M V., Ashbolt NJ. Persistence of two model enteric viruses (B40-8 and MS-2

- 572 bacteriophages) in water distribution pipe biofilms. *Water Sci Technol.* 2001;43: 133–138.  
573 doi:10.2166/wst.2001.0724
- 574 32. Storey M V., Ashbolt NJ. Enteric virions and microbial biofilms - A secondary source of  
575 public health concern? *Water Sci Technol.* 2003;48: 97–104. doi:10.2166/WST.2003.0172
- 576 33. Hendricks MR, Lashua LP, Fischer DK, Flitter BA, Eichinger KM, Durbin JE, et al.  
577 Respiratory syncytial virus infection enhances *Pseudomonas aeruginosa* biofilm growth  
578 through dysregulation of nutritional immunity. *Proc Natl Acad Sci U S A.* 2016;113:  
579 1642–1647. doi:10.1073/PNAS.1516979113/-/DCSUPPLEMENTAL
- 580 34. van Doremalen N, Bushmaker T, Morris DH, Holbrook MG, Gamble A, Williamson BN,  
581 et al. Aerosol and Surface Stability of SARS-CoV-2 as Compared with SARS-CoV-1. *N*  
582 *Engl J Med.* 2020;382: 1564–1567.  
583 doi:10.1056/NEJMC2004973/SUPPL\_FILE/NEJMC2004973\_DISCLOSURES.PDF
- 584 35. Aboubakr HA, Sharafeldin TA, Goyal SM. Stability of SARS-CoV-2 and other  
585 coronaviruses in the environment and on common touch surfaces and the influence of  
586 climatic conditions: A review. *Transbound Emerg Dis.* 2021;68: 296–312.  
587 doi:10.1111/TBED.13707
- 588 36. Neu U, Mainou BA. Virus interactions with bacteria: Partners in the infectious dance.  
589 *PLOS Pathog.* 2020;16: e1008234. doi:10.1371/JOURNAL.PPAT.1008234
- 590 37. Kalantar-Zadeh K, Ward SA, Kalantar-Zadeh K, El-Omar EM. Considering the Effects of  
591 Microbiome and Diet on SARS-CoV-2 Infection: Nanotechnology Roles. *ACS Nano.*  
592 2020;14: 5179–5182. doi:10.1021/ACSNANO.0C03402
- 593 38. Berger AK, Yi H, Kearns DB, Mainou BA. Bacteria and bacterial envelope components  
594 enhance mammalian reovirus thermostability. *PLoS Pathog.* 2017;13.

- 595 doi:10.1371/JOURNAL.PPAT.1006768
- 596 39. Dhalech AH, Fuller TD, Robinson CM. Specific Bacterial Cell Wall Components  
597 Influence the Stability of Coxsackievirus B3. *J Virol.* 2021;95. doi:10.1128/JVI.01424-  
598 21/ASSET/988AAC2E-C656-483F-A08A-  
599 AE3D10400DA6/ASSETS/IMAGES/LARGE/JVI.01424-21-F006.JPG
- 600 40. Guven-Maiorov E, Hakouz A, Valjevac S, Keskin O, Tsai CJ, Gursoy A, et al. HMI-  
601 PRED: A Web Server for Structural Prediction of Host-Microbe Interactions Based on  
602 Interface Mimicry. *J Mol Biol.* 2020;432: 3395. doi:10.1016/J.JMB.2020.01.025
- 603 41. Otter JA, Donskey C, Yezli S, Douthwaite S, Goldenberg SD, Weber DJ. Transmission of  
604 SARS and MERS coronaviruses and influenza virus in healthcare settings: the possible  
605 role of dry surface contamination. *J Hosp Infect.* 2016;92: 235.  
606 doi:10.1016/J.JHIN.2015.08.027
- 607 42. Krumel TP, Goodrich C. COVID-19 Working Paper: Meatpacking Working Conditions  
608 and the Spread of COVID-19. In: United States Department of Agriculture [Internet].  
609 2021 [cited 21 Jan 2022]. Available: [https://www.ers.usda.gov/publications/pub-](https://www.ers.usda.gov/publications/pub-details/?pubid=102205)  
610 [details/?pubid=102205](https://www.ers.usda.gov/publications/pub-details/?pubid=102205)
- 611 43. Saitone TL, Aleks Schaefer K, Scheitrum DP. COVID-19 morbidity and mortality in U.S.  
612 meatpacking counties. *Food Policy.* 2021;101: 102072.  
613 doi:10.1016/J.FOODPOL.2021.102072
- 614 44. Steinberg J, Kennedy ED, Basler C, Grant MP, Jacobs JR, Ortbahn D, et al. COVID-19  
615 Outbreak Among Employees at a Meat Processing Facility — South Dakota, March–April  
616 2020. *MMWR Morb Mortal Wkly Rep.* 2022;69: 1015–1019.  
617 doi:10.15585/MMWR.MM6931A2

- 618 45. Sofos JN, Geornaras I. Overview of current meat hygiene and safety risks and summary of  
619 recent studies on biofilms, and control of *Escherichia coli* O157:H7 in nonintact, and  
620 *Listeria monocytogenes* in ready-to-eat, meat products. *Meat Sci.* 2010;86: 2–14.  
621 doi:10.1016/J.MEATSCI.2010.04.015
- 622 46. Skraber S, Ogorzaly L, Helmi K, Maul A, Hoffmann L, Cauchie HM, et al. Occurrence  
623 and persistence of enteroviruses, noroviruses and F-specific RNA phages in natural  
624 wastewater biofilms. *Water Res.* 2009;43: 4780–4789.  
625 doi:10.1016/J.WATRES.2009.05.020
- 626 47. Von Borowski RG, Trentin DS. Biofilms and Coronavirus Reservoirs: a Perspective  
627 Review. *Appl Environ Microbiol.* 2021;87: 1–14. doi:10.1128/AEM.00859-21
- 628 48. Almand EA, Moore MD, Jaykus LA. Virus-Bacteria Interactions: An Emerging Topic in  
629 Human Infection. *Viruses.* 2017;9. doi:10.3390/V9030058
- 630 49. Dass S, Wang B, Stratton J, Bianchini A, Ababdappa A. Food processing environment  
631 surveillance using amplicon metagenomics: Assessing the change in the microbiome of a  
632 fluid milk processing facility before and after cleaning. *Fac Publ Food Sci Technol.* 2018  
633 [cited 18 Feb 2022]. Available: <https://digitalcommons.unl.edu/foodsciefacpub/289>
- 634 50. Dhand R, Li J. Coughs and Sneezes: Their Role in Transmission of Respiratory Viral  
635 Infections, Including SARS-CoV-2. *Am J Respir Crit Care Med.* 2020;202: 651–659.  
636 doi:10.1164/RCCM.202004-1263PP
- 637 51. Mittal R, Ni R, Seo JH. The flow physics of COVID-19. *J Fluid Mech.* 2020;894.  
638 doi:10.1017/JFM.2020.330
- 639 52. Mendoza EJ, Manguiat K, Wood H, Drebot M. Two Detailed Plaque Assay Protocols for  
640 the Quantification of Infectious SARS-CoV-2. *Curr Protoc Microbiol.* 2020;57: 1–15.

641 doi:10.1002/cpmc.105

642 53. Leibowitz J, Kaufman G, Liu P. Coronaviruses: Propagation, Quantification, Storage, and  
643 Construction of Recombinant Mouse Hepatitis Virus. *Curr Protoc Microbiol.* 2020;21: 1–  
644 37. doi:10.1002/9780471729259.mc15e01s21

645 54. Schmittgen TD, Livak KJ. Analyzing real-time PCR data by the comparative CT method.  
646 *Nat Protoc.* 2008;3: 1101–1108. doi:10.1038/nprot.2008.73

647

648 **Figure Legends**

649 **Fig. 1** CFU counts from biofilm with SARS-CoV-2 Delta variant and biofilm without  
650 SARS-CoV-2 Delta variant samples on stainless steel, PVC, and tile chips. (A-I) CFU counts for  
651 biofilm with SARS-CoV-2 Delta variant and biofilm without SARS-CoV-2 Delta variant  
652 samples on stainless steel, PVC, and tile chips (A-C) from Plant A, (D-F) from Plant B, and (G-  
653 I) from Plant C. Each sample was plated in duplicate. Results in this figure are the mean values  
654 and standard deviations (error bars) from three independent experiments. Statistical significance  
655 was analyzed by unpaired t-test. \*:  $p < 0.05$ ; \*\*:  $p < 0.01$ ; \*\*\*:  $p < 0.001$ ; \*\*\*\*:  $p < 0.0001$ .

656 **Fig. 2** RT-qPCR analysis of SARS-CoV-2 Delta variant mixed with biofilm organisms  
657 and pre-incubated for 5 days on stainless steel, PVC, and ceramic tile chips. (A-C) RT-qPCR  
658 analysis of SARS-CoV-2 Delta variant mixed with environmental biofilm organisms from Plant  
659 A on stainless steel, PVC and on ceramic tile chips, (D-F) RT-qPCR analysis of SARS-CoV-2  
660 Delta variant mixed with environmental biofilm organisms from Plant B on stainless steel, PVC,  
661 and on ceramic tile chips, (G-I) RT-qPCR analysis of SARS-CoV-2 Delta variant mixed with  
662 environmental biofilm organisms from Plant C on stainless steel, PVC, and on ceramic tile chips.

663  $1.0 \times 10^4$  PFU of SARS-CoV-2 Delta variant were added to a stainless steel, PVC, or  
664 ceramic tile chip along with a floor drain biofilm sample collected from the cooler of meat  
665 packaging plant A, B, or C. The RT-qPCR samples were analyzed in duplicate. Gene copy  
666 numbers were calculated from a standard curve of known quantities of SARS-CoV-2 Delta  
667 variant RNA in a 25  $\mu$ L qPCR reaction. Results in this figure are the mean values and standard  
668 deviations (error bars) from three independent experiments. Statistical significance was analyzed  
669 by unpaired t-test. ns: not significant; \*\*:  $p < 0.01$ ; \*\*\*:  $p < 0.001$ .

670 **Fig. 3** Plaque assay results from biofilm with SARS-CoV-2 Delta variant and SARS-  
671 CoV-2 Delta variant without biofilm samples on stainless steel, PVC, and ceramic tile chips. (A-  
672 I) Results from plaque assays on samples collected from (A-C) stainless steel, (D-F) PVC, and  
673 (G-I) ceramic tile chips. Each sample was filtered through a 0.45  $\mu\text{m}$  filter and plated on Vero  
674 CCL-81 cells in duplicate. Results in this figure are the mean values and standard deviations  
675 (error bars) from three independent experiments. Statistical significance was analyzed by  
676 unpaired t-test. \*\*:  $p < 0.01$ ; \*\*\*\*:  $p < 0.0001$ .

677 **Fig. 4** Schematic representation of floor drain biofilm and virus experiment. (A and B):  
678 Experimental set up with Biofilm with SARS-CoV-2 Delta variant, Biofilm without SARS-CoV-  
679 2 Delta variant, SARS-CoV-2 Delta variant - Biofilm, and Negative Control in duplicate. The  
680 experimental set is incubated at 7°C for 5 days. (C). After 5 days, the biofilm was harvested from  
681 SS, PVC, or ceramic tile chips using a cell lifter and forceps and rinsed with 1000  $\mu\text{L}$  of LB-NS.  
682 (D) Harvested cells were stored in a screw-cap tube at -80°C until needed.

683 **Fig. 5:** Results from evaporation dynamics assays of water droplets inoculated on  
684 different substrates: stainless steel (red, circles), PVC (green, diamonds) and ceramic tile (blue,  
685 triangles) samples. (A) Weight fraction of liquid remaining on the substrates as a function of  
686 time (hours) after inoculation. The data points represent mean values over  $N=6$  replicates, and  
687 the error bars show the standard error (SE) over these replicates. The curves show exponential  
688 decay fits to these data points. (B) Half-life time of evaporation from the different materials,  
689 obtained from these exponential decay fits. This gives  $88 \pm 9$  hours,  $110 \pm 16$  hours,  $127 \pm 10$   
690 hours, respectively, where the error bars are quantified by the standard error (SE) of the data sets.  
691

692 Tables:

693           Table 1: Data from the Biofilm +/- SARS-CoV-2 Delta variant CFU/mL count from  
694 different experimental conditions. Table 1 indicates CFU/mL numbers and the percentage and  
695 fold change compared to the initial biofilm inoculum.

696           Table 2: Data from the Biofilm +/- SARS-CoV-2 Delta variant RT-qPCR analyses on the  
697 recovered SARS-CoV-2 Delta variant RNA from the different experimental conditions. Table 2  
698 indicates CT numbers and the percentage and fold change from the initial inoculum ( $1.0 \times 10^4$ ).

699           Table 3: Data from the plaque assay analysis on the recovered SARS-CoV-2 Delta  
700 variant viral particles incubated with biofilm. Table 3 indicates PFU/mL numbers and the  
701 percentage and fold change from the initial inoculum ( $1.0 \times 10^4$ ).

702

703



704 Fig. 1

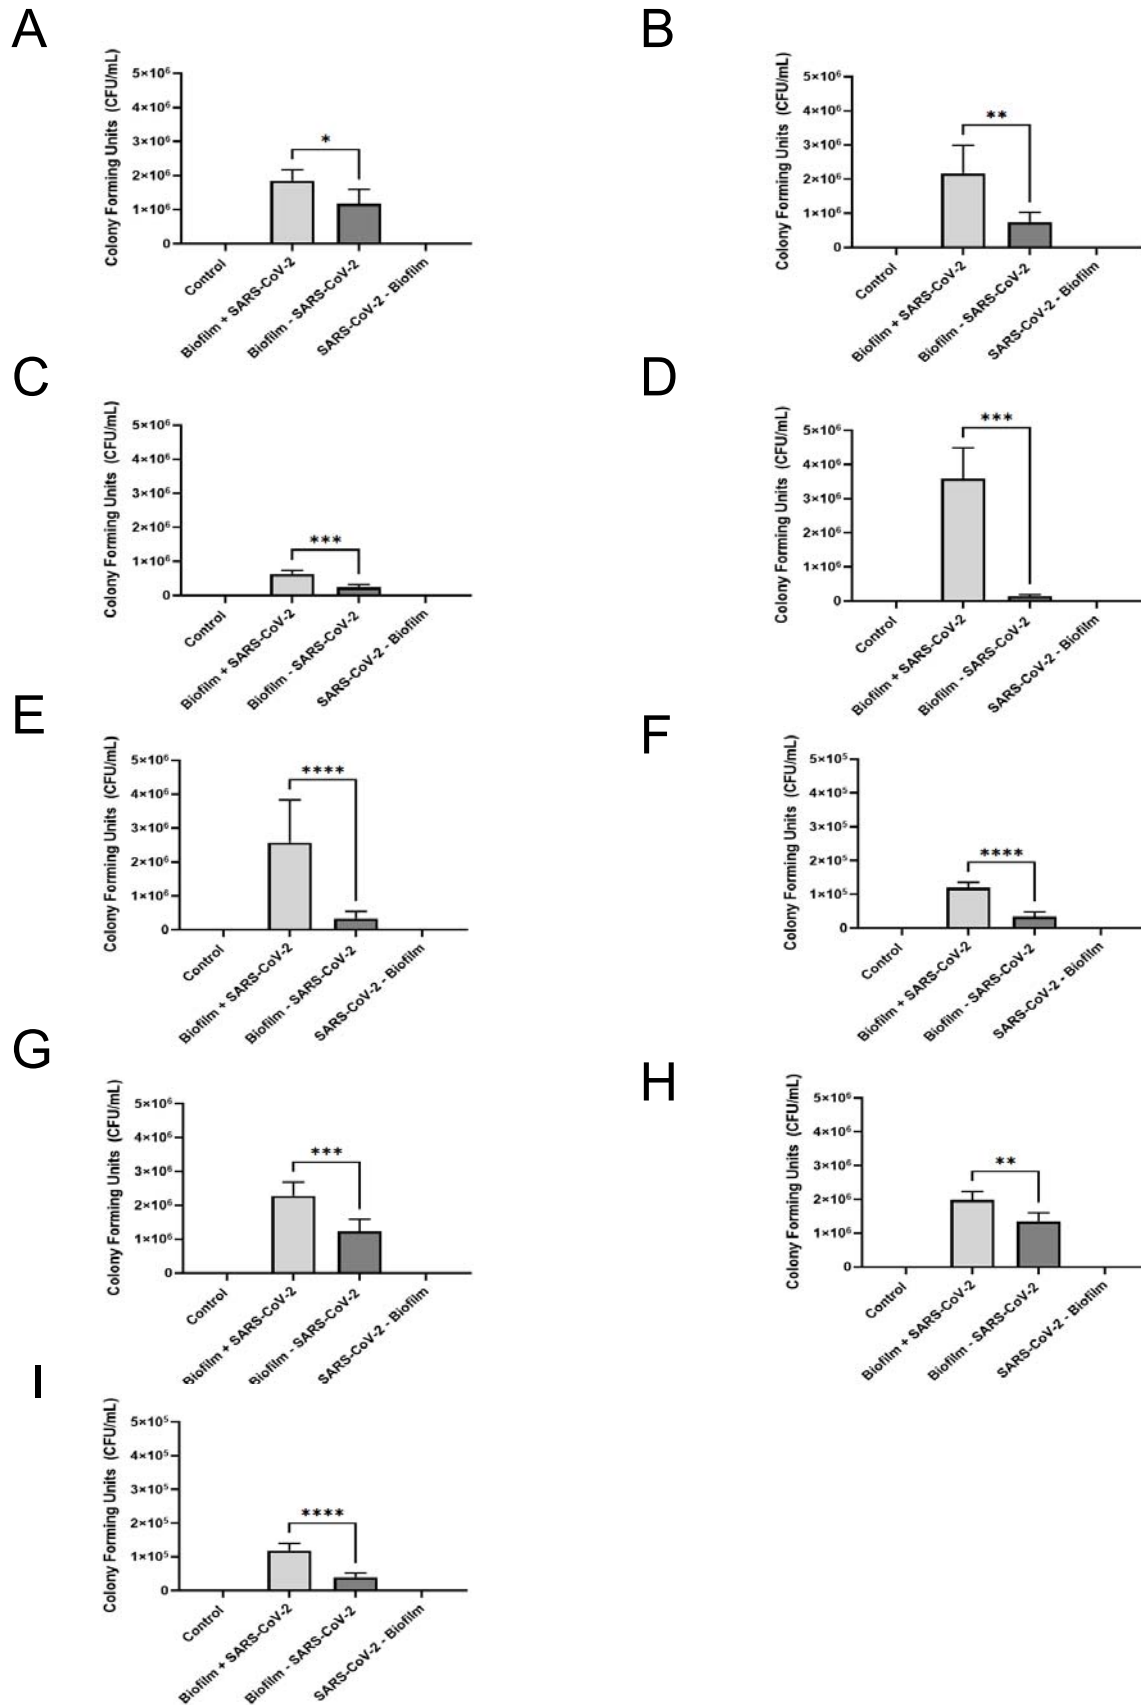

705 Fig. 2

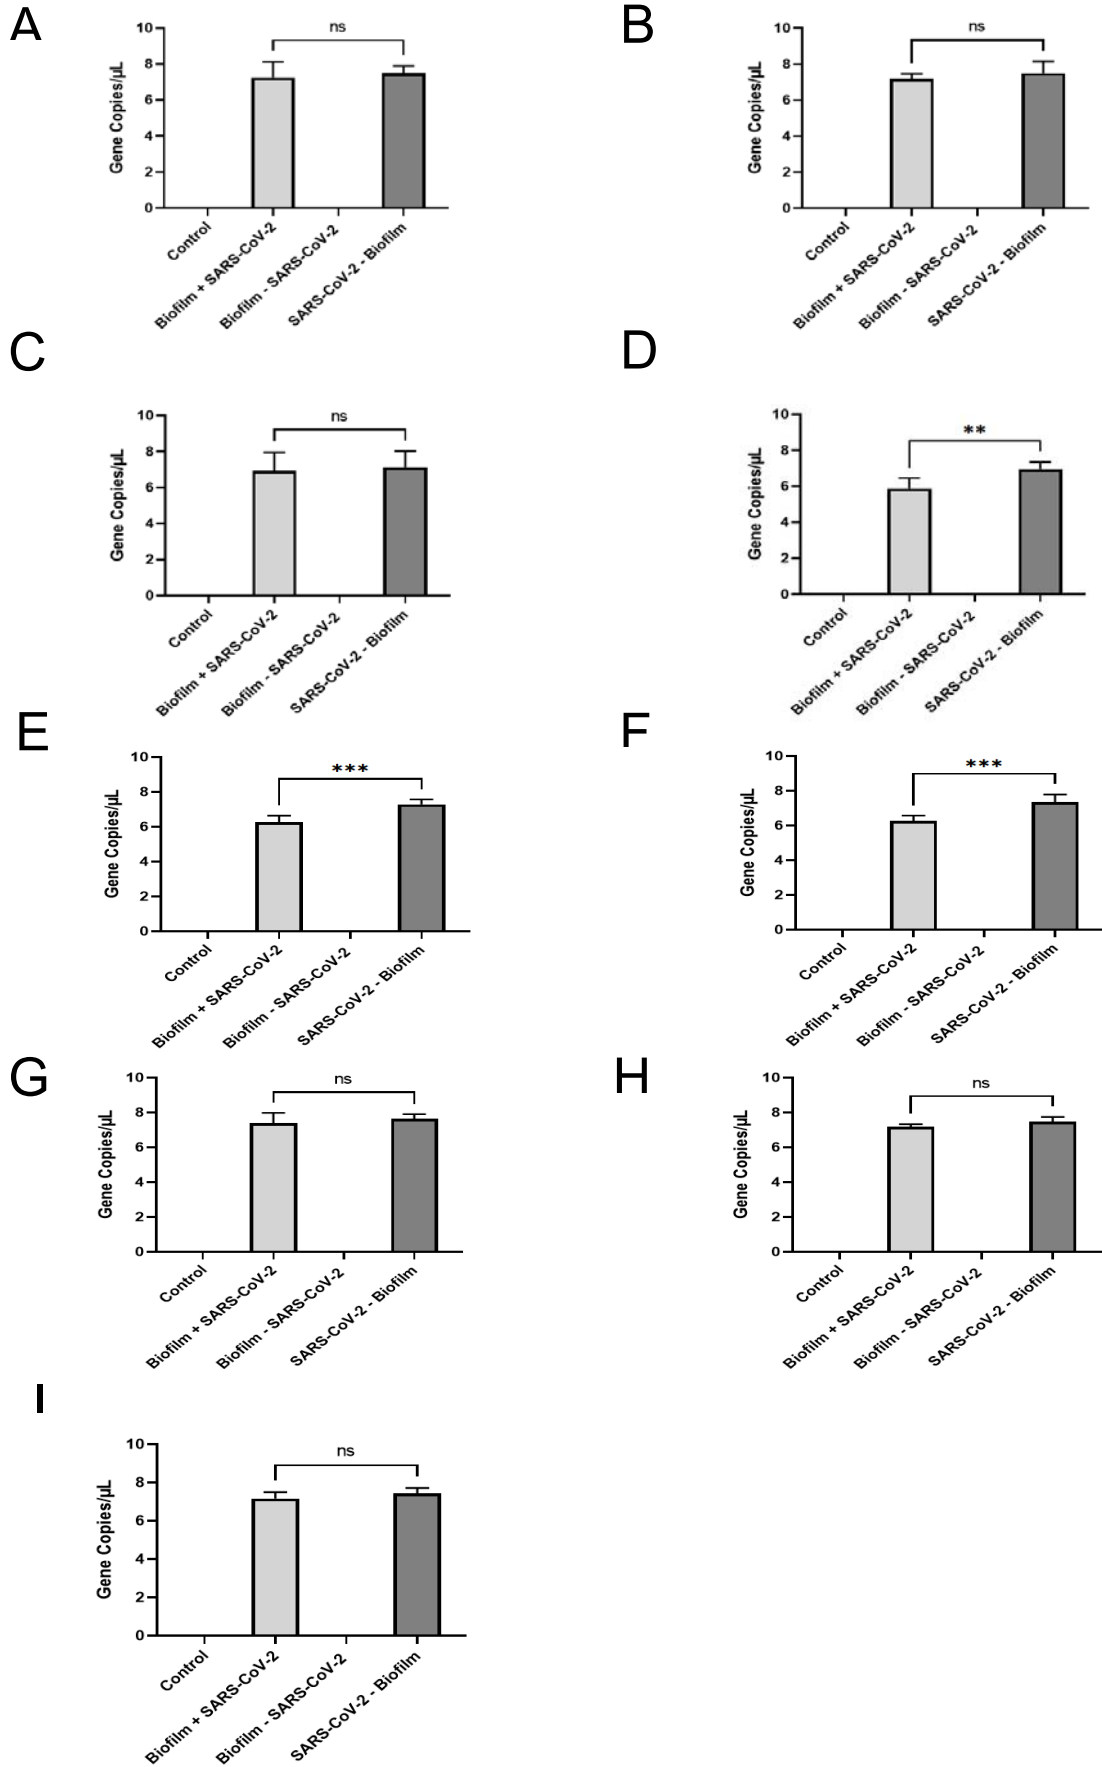

706 Fig. 3

707

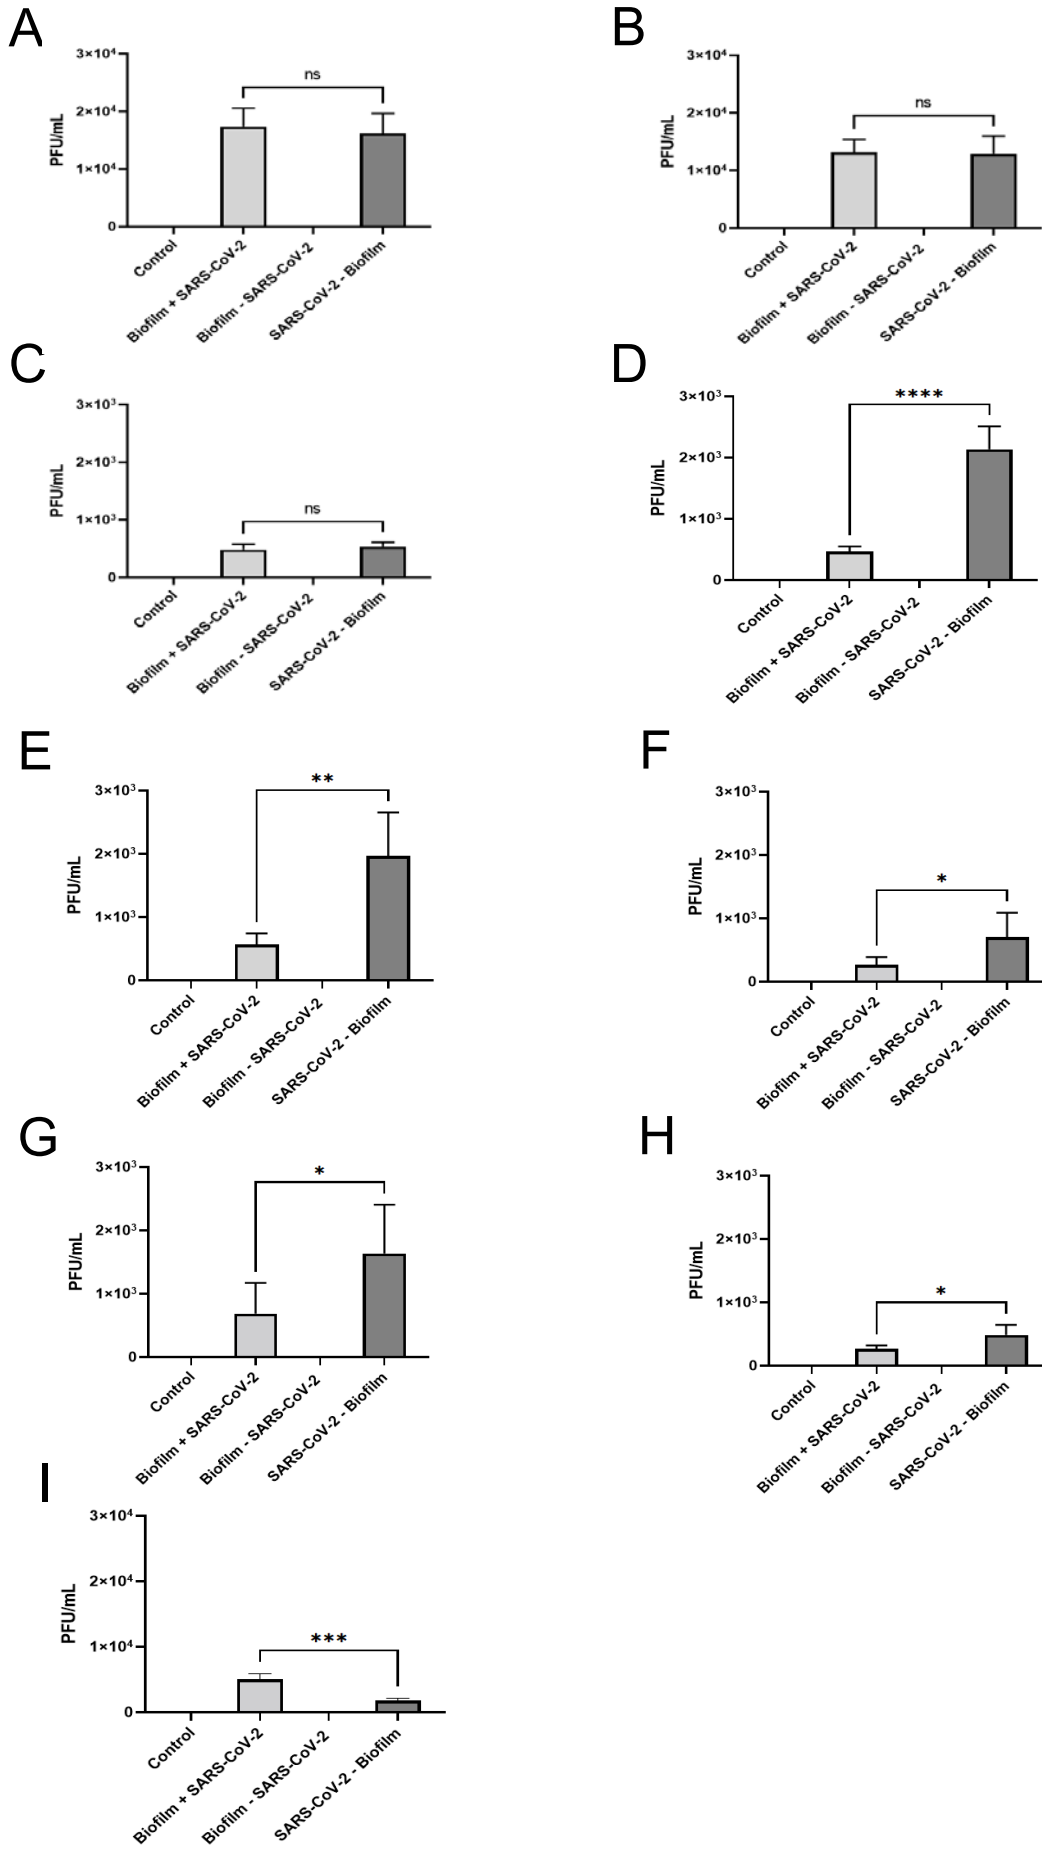

708 Fig. 4

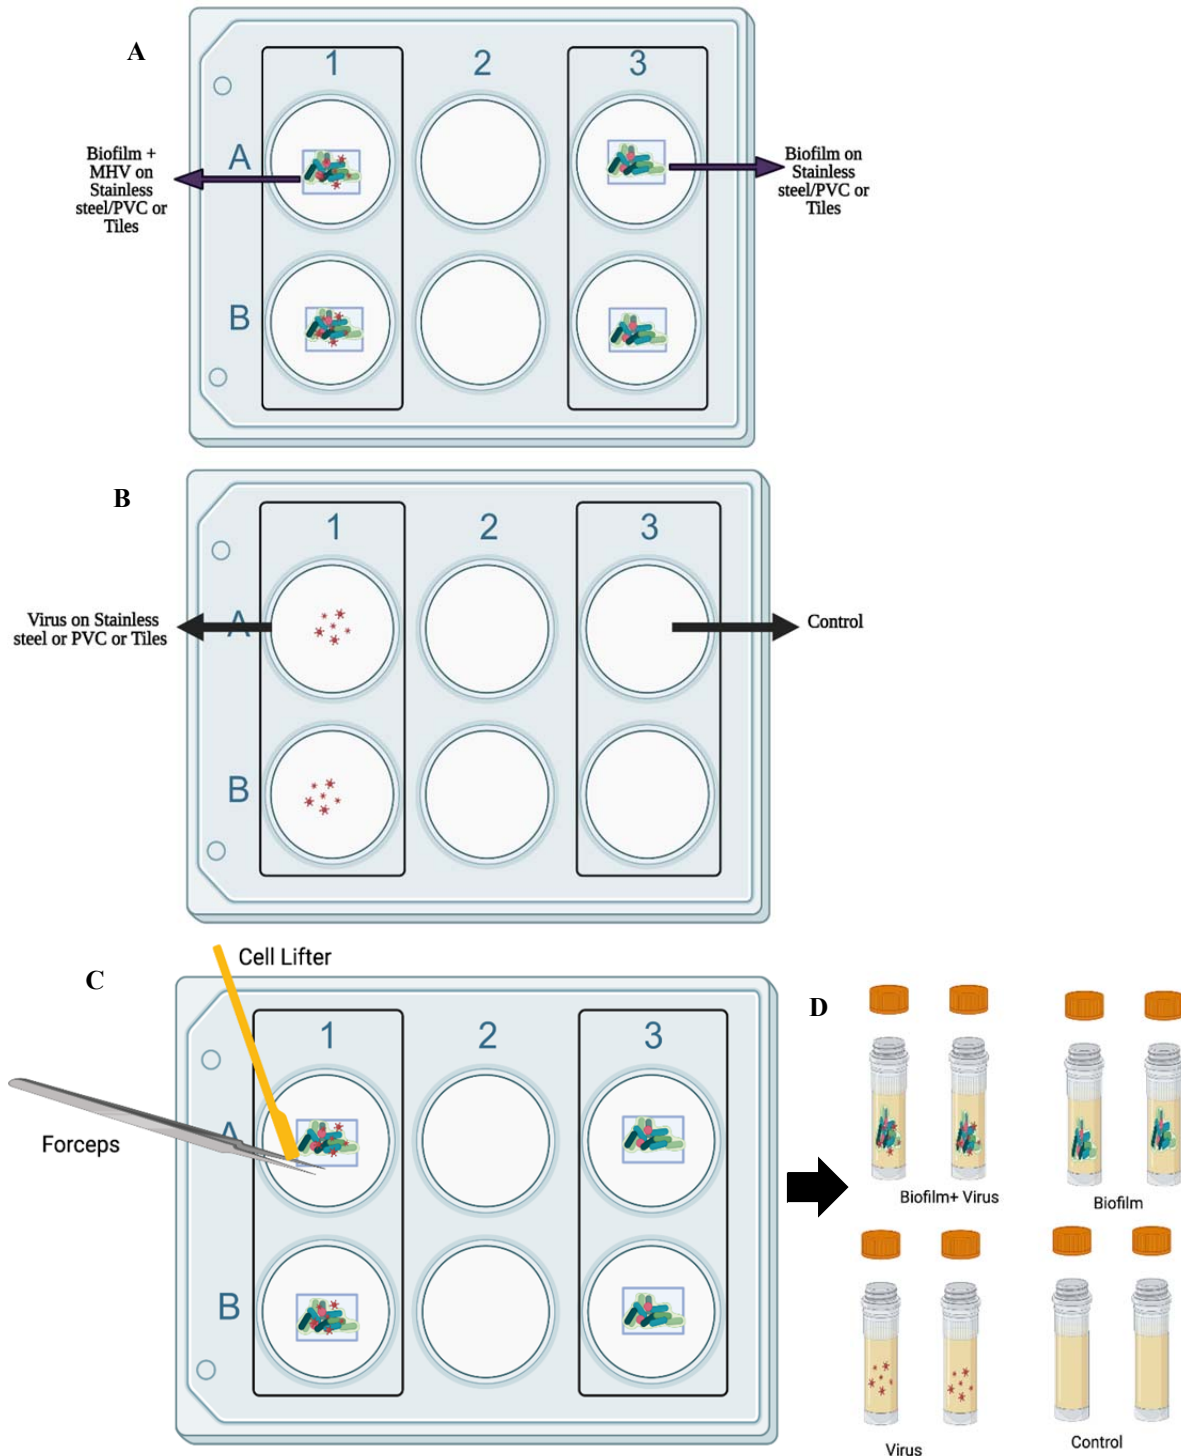

709 Fig. 5

710

711

A

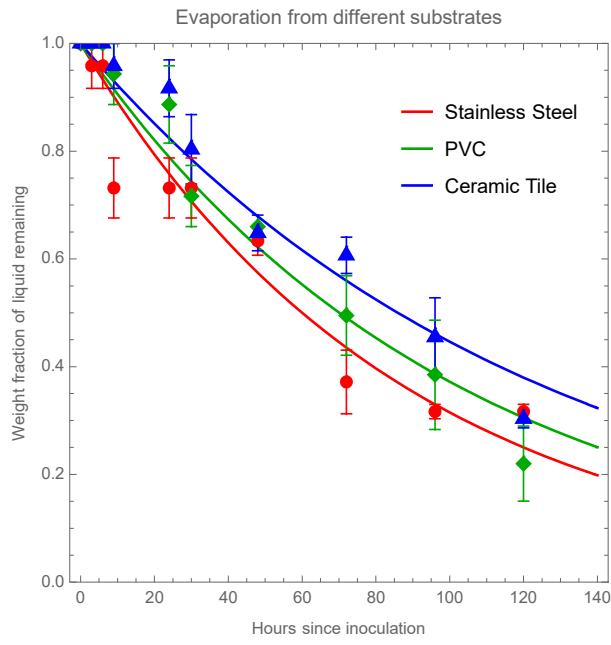

B

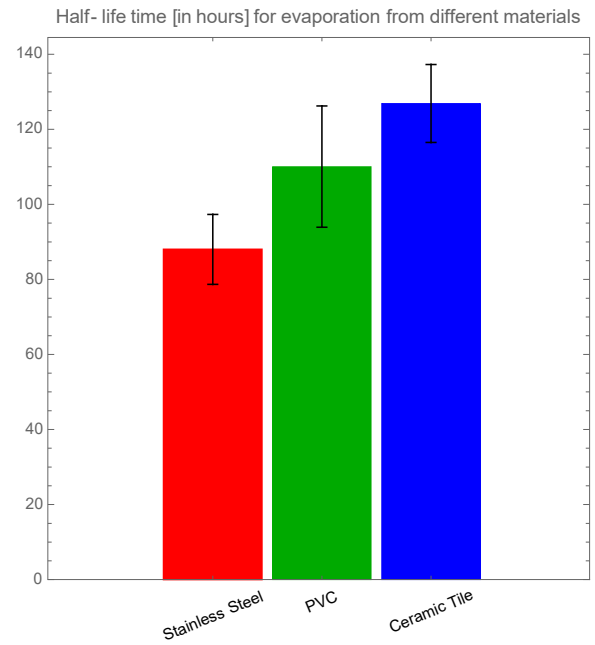

712 Table 1.

|                      | CFU/mL for Biofilm A + SARS-CoV-2 on SS                                                                                                  | CFU/mL for Biofilm A + SARS-CoV-2 on PVC                                                                                                              | CFU/mL for Biofilm A + SARS-CoV-2 on ceramic tile                                                                                            | CFU/mL for Biofilm B + SARS-CoV-2 on SS                                                                                                       | CFU/mL for Biofilm B + SARS-CoV-2 on PVC                                                                                                           | CFU/mL for Biofilm B + SARS-CoV-2 on ceramic tile                                                                                            | CFU/mL for Biofilm C + SARS-CoV-2 on SS                                                                                                      | CFU/mL for Biofilm C + SARS-CoV-2 on PVC                                                                                                        | CFU/mL for Biofilm C + SARS-CoV-2 on ceramic tile                                                                                             |
|----------------------|------------------------------------------------------------------------------------------------------------------------------------------|-------------------------------------------------------------------------------------------------------------------------------------------------------|----------------------------------------------------------------------------------------------------------------------------------------------|-----------------------------------------------------------------------------------------------------------------------------------------------|----------------------------------------------------------------------------------------------------------------------------------------------------|----------------------------------------------------------------------------------------------------------------------------------------------|----------------------------------------------------------------------------------------------------------------------------------------------|-------------------------------------------------------------------------------------------------------------------------------------------------|-----------------------------------------------------------------------------------------------------------------------------------------------|
| Control              | 0; 0                                                                                                                                     | 0; 0                                                                                                                                                  | 0; 0                                                                                                                                         | 0; 0                                                                                                                                          | 0; 0                                                                                                                                               | 0; 0                                                                                                                                         | 0; 0                                                                                                                                         | 0; 0                                                                                                                                            | 0; 0                                                                                                                                          |
| Biofilm+SA RS-CoV-2  | 1.95 x 10 <sup>6</sup> (+30.0%, +1.3-fold);<br>2.00 x 10 <sup>6</sup> (+100%, +2.0-fold);<br>1.60 x 10 <sup>6</sup> (+60.0%, +1.6-fold). | 2.50 x 10 <sup>6</sup> (+1,900.0%, +20.0-fold);<br>4.00 x 10 <sup>6</sup> (+1,900.0%, +20.0-fold);<br>4.25 x 10 <sup>6</sup> (+3763.6%, +38.64-fold). | 1.90 x 10 <sup>6</sup> (+46.2%, +1.46-fold);<br>2.25 x 10 <sup>6</sup> (+80.0%, +1.8-fold);<br>2.75 x 10 <sup>6</sup> (+139.1%, +2.39-fold). | 1.40 x 10 <sup>6</sup> (+75.0%, +1.75-fold);<br>2.00 x 10 <sup>6</sup> (+100.0%, +2.0-fold);<br>3.10 x 10 <sup>6</sup> (+638.1%, +7.38-fold). | 2.50x 10 <sup>6</sup> (+1900.0%, +20.0-fold);<br>4.00 x 10 <sup>6</sup> (+1900.0%, +20.0-fold);<br>4.25 x 10 <sup>6</sup> (+3763.6%, +38.64-fold). | 2.20 x 10 <sup>6</sup> (+57.1%, +1.57-fold);<br>1.98 x 10 <sup>6</sup> (+58.4%, +1.58-fold);<br>1.77 x 10 <sup>6</sup> (+26.4%, +1.26-fold). | 6.90 x 10 <sup>5</sup> (+345.2%, +4.45-fold);<br>6.40 x 10 <sup>5</sup> (+100%, +2.0-fold);<br>5.40 x 10 <sup>5</sup> (+134.8%, +2.35-fold). | 1.35 x 10 <sup>5</sup> (+429.4%, +5.29-fold);<br>1.07 x 10 <sup>5</sup> (+105.8%, +2.06-fold);<br>1.15E x 10 <sup>5</sup> (+342.3%, 4.42-fold). | 1.02 x 10 <sup>5</sup> (+88.9%, 1.89-fold);<br>1.22 x 10 <sup>5</sup> (+225.3%, +3.25-fold);<br>1.32 x 10 <sup>5</sup> (+417.6%, +5.18-fold). |
| Biofilm - SARS-CoV-2 | 1.50 x 10 <sup>6</sup> ;<br>1.00 x 10 <sup>6</sup> ;<br>1.00 x 10 <sup>6</sup>                                                           | 1.25 x 10 <sup>5</sup> ;<br>2.00 x 10 <sup>5</sup> ;<br>1.10 x 10 <sup>5</sup>                                                                        | 1.30 x 10 <sup>6</sup> ;<br>1.25 x 10 <sup>6</sup> ;<br>1.15 x 10 <sup>6</sup>                                                               | 8.00 x 10 <sup>5</sup> ;<br>1.00 x 10 <sup>6</sup> ;<br>4.20 x 10 <sup>5</sup>                                                                | 1.25 x 10 <sup>5</sup> ;<br>2.00 x 10 <sup>5</sup> ;<br>1.10 x 10 <sup>5</sup>                                                                     | 1.40 x 10 <sup>6</sup> ;<br>1.25 x 10 <sup>6</sup> ;<br>1.40 x 10 <sup>6</sup>                                                               | 1.55 x 10 <sup>5</sup> ;<br>3.20 x 10 <sup>5</sup> ;<br>2.30 x 10 <sup>5</sup>                                                               | 2.55 x 10 <sup>4</sup> ;<br>5.20 x 10 <sup>4</sup> ;<br>2.60 x 10 <sup>4</sup>                                                                  | 5.40 x 10 <sup>4</sup> ;<br>3.75 x 10 <sup>4</sup> ;<br>2.55 x 10 <sup>4</sup>                                                                |
| SARS-CoV-2 - Biofilm | 0; 0                                                                                                                                     | 0; 0                                                                                                                                                  | 0; 0                                                                                                                                         | 0; 0                                                                                                                                          | 0; 0                                                                                                                                               | 0; 0                                                                                                                                         | 0; 0                                                                                                                                         | 0; 0                                                                                                                                            | 0; 0                                                                                                                                          |

713

714 Table 2.

|                      | N-gene CT # for Biofilm A + SARS-CoV-2 on SS                                   | N-gene CT # for Biofilm A + SARS-CoV-2 on PVC                                  | N-gene CT # for Biofilm A + SARS-CoV-2 on ceramic tile                       | N-gene CT # for Biofilm B + SARS-CoV-2 on SS                                    | N-gene CT # for Biofilm B + SARS-CoV-2 on PVC                                   | N-gene CT # for Biofilm B + SARS-CoV-2 on ceramic tile                           | N-gene CT # for Biofilm C + SARS-CoV-2 on SS                                  | N-gene CT # for Biofilm C + SARS-CoV-2 on PVC                               | N-gene CT # for Biofilm C + SARS-CoV-2 on ceramic tile                         |
|----------------------|--------------------------------------------------------------------------------|--------------------------------------------------------------------------------|------------------------------------------------------------------------------|---------------------------------------------------------------------------------|---------------------------------------------------------------------------------|----------------------------------------------------------------------------------|-------------------------------------------------------------------------------|-----------------------------------------------------------------------------|--------------------------------------------------------------------------------|
| Control              | 0; 0                                                                           | 0; 0                                                                           | 0; 0                                                                         | 0; 0                                                                            | 0; 0                                                                            | 0; 0                                                                             | 0; 0                                                                          | 0; 0                                                                        | 0; 0                                                                           |
| Biofilm+SARS-CoV-2   | 22.9 (+13.4%, +1.13-fold); 22.0 (+3.3%, +1.03-fold); 17.2 (-6.5%, -1.07-fold). | 21.4 (+4.4%, +1.04-fold); 20.3 (-1.9%, -1.02-fold); 20.7 (+12.5%, +1.13-fold). | 22.9 (+6.5%, +1.07-fold); 22.3 (+1.4%, +1.01-fold); 19.6 (+0.0%, +0.0-fold). | 24.9 (+16.4%, 1.16-fold); 23.7 (+16.2%, +1.16-fold); 21.4 (+12.6%, +1.13-fold). | 23.2 (+22.8%, +1.23-fold); 21.9 (+14.1%, +1.14-fold); 21.6 (+9.7%, +1.10-fold). | 22.5 (+15.4%, +1.15-fold); 22.4 (+12.0%, +1.12-fold); 21.8 (+21.8%, +1.22-fold). | 19.7 (+3.7%, +1.04-fold); 20.0 (+7.0%, +1.07-fold); 18.3 (+1.7%, +1.02-fold). | 19.7 (+5.9%, +1.06-fold); 20.3 (+7.4%, 1.07-fold); 19.8 (+0.0%, +0.0-fold). | 19.4 (+2.6%, +1.03-fold); 21.1 (+12.8%, +1.13-fold); 19.5 (-2.0%, -1.02-fold). |
| Biofilm - SARS-CoV-2 | 0; 0                                                                           | 0; 0                                                                           | 0; 0                                                                         | 0; 0                                                                            | 0; 0                                                                            | 0; 0                                                                             | 0; 0                                                                          | 0; 0                                                                        | 0; 0                                                                           |
| SARS-CoV-2 - Biofilm | 20.2; 21.3; 18.4                                                               | 20.5; 20.7; 18.4                                                               | 21.5; 22.0; 19.6                                                             | 21.4; 20.4; 19.0                                                                | 18.9; 19.2; 19.7                                                                | 19.5; 20.0; 17.9                                                                 | 19.0; 18.7; 18.0                                                              | 18.6; 18.9; 19.8                                                            | 18.9; 18.7; 19.9                                                               |

715

716 Table 3.

|                      | PFU/mL for Biofilm A + SARS-CoV-2 on SS                                                                                                   | PFU/mL for Biofilm A + SARS-CoV-2 on PVC                                                                                                    | PFU/mL for Biofilm A + SARS-CoV-2 on Tile                                                                                                | PFU/mL for Biofilm B + SARS-CoV-2 on SS                                                                                                     | PFU/mL for Biofilm B + SARS-CoV-2 on PVC                                                                                                    | PFU/mL for Biofilm B + SARS-CoV-2 on Tile                                                                                                    | PFU/mL for Biofilm C + SARS-CoV-2 on SS                                                                                                      | PFU/mL for Biofilm C + SARS-CoV-2 on PVC                                                                                                      | PFU/mL for Biofilm C + SARS-CoV-2 on Tile                                                                                                       |
|----------------------|-------------------------------------------------------------------------------------------------------------------------------------------|---------------------------------------------------------------------------------------------------------------------------------------------|------------------------------------------------------------------------------------------------------------------------------------------|---------------------------------------------------------------------------------------------------------------------------------------------|---------------------------------------------------------------------------------------------------------------------------------------------|----------------------------------------------------------------------------------------------------------------------------------------------|----------------------------------------------------------------------------------------------------------------------------------------------|-----------------------------------------------------------------------------------------------------------------------------------------------|-------------------------------------------------------------------------------------------------------------------------------------------------|
| Control              | 0; 0                                                                                                                                      | 0; 0                                                                                                                                        | 0; 0                                                                                                                                     | 0; 0                                                                                                                                        | 0; 0                                                                                                                                        | 0; 0                                                                                                                                         | 0; 0                                                                                                                                         | 0; 0                                                                                                                                          | 0; 0                                                                                                                                            |
| Biofilm+SARS-CoV-2   | 1.40 x 10 <sup>4</sup> (+7.7%, +1.08-fold);<br>1.90 x 10 <sup>4</sup> (+0.0%, +0.0-fold);<br>1.90 x 10 <sup>4</sup> (+15.2%, +1.15-fold). | 1.35 x 10 <sup>4</sup> (-10.0%, -1.11-fold);<br>1.30 x 10 <sup>4</sup> (+36.8%, +1.37-fold);<br>1.30 x 10 <sup>4</sup> (-7.1%, -1.08-fold). | 5.50 x 10 <sup>2</sup> (+0.0%, +0.0-fold);<br>5.00 x 10 <sup>2</sup> (+0.0%, +0.0-fold);<br>4.00 x 10 <sup>2</sup> (-27.3%, -1.38-fold). | 4.50 x 10 <sup>2</sup> (-74.3%, -3.89-fold);<br>5.00 x 10 <sup>2</sup> (-79.6%, -4.9-fold);<br>4.50 x 10 <sup>2</sup> (-79.5%, -4.89-fold). | 4.00 x 10 <sup>2</sup> (-69.2%, -3.25-fold);<br>5.50 x 10 <sup>2</sup> (-71.1%, -3.45-fold);<br>7.50 x 10 <sup>2</sup> (-72.2%, -3.6-fold). | 2.00 x 10 <sup>2</sup> (-55.6%, -2.25-fold);<br>2.00 x 10 <sup>2</sup> (-55.6%, -2.25-fold);<br>4.00 x 10 <sup>2</sup> (-66.7%, -3.00-fold). | 3.00 x 10 <sup>2</sup> (-57.1%, -2.33-fold);<br>4.50 x 10 <sup>2</sup> (-76.3%, -4.22-fold);<br>1.30 x 10 <sup>3</sup> (-43.5%, -1.77-fold). | 2.00 x 10 <sup>2</sup> (-100.0%, -2.00-fold);<br>3.00 x 10 <sup>2</sup> (-25.0%, -1.25-fold);<br>3.00 x 10 <sup>2</sup> (-53.8%, -2.17-fold). | 4.50 x 10 <sup>3</sup> (+114.3%, +2.14-fold);<br>5.50 x 10 <sup>3</sup> (+233.3%, +3.33-fold);<br>5.00 x 10 <sup>3</sup> (+194.1%, +2.94-fold). |
| Biofilm - SARS-CoV-2 | 0; 0                                                                                                                                      | 0; 0                                                                                                                                        | 0; 0                                                                                                                                     | 0; 0                                                                                                                                        | 0; 0                                                                                                                                        | 0; 0                                                                                                                                         | 0; 0                                                                                                                                         | 0; 0                                                                                                                                          | 0; 0                                                                                                                                            |
| SARS-CoV-2 - Biofilm | 1.30 x 10 <sup>4</sup> ;<br>1.90 x 10 <sup>4</sup> ;<br>1.65 x 10 <sup>4</sup>                                                            | 1.50 x 10 <sup>4</sup> ;<br>9.50 x 10 <sup>3</sup> ;<br>1.40 x 10 <sup>4</sup>                                                              | 5.50 x 10 <sup>2</sup> ;<br>5.00 x 10 <sup>2</sup> ;<br>5.50 x 10 <sup>2</sup>                                                           | 1.75 x 10 <sup>3</sup> ;<br>2.45 x 10 <sup>3</sup> ;<br>2.20 x 10 <sup>3</sup>                                                              | 1.30E+03<br>1.90E+03<br>2.70E+03                                                                                                            | 4.50 x 10 <sup>2</sup> ;<br>4.50 x 10 <sup>2</sup> ;<br>1.20 x 10 <sup>3</sup>                                                               | 7.00 x 10 <sup>2</sup> ;<br>1.90 x 10 <sup>3</sup> ;<br>2.30 x 10 <sup>3</sup>                                                               | 4.00 x 10 <sup>2</sup> ;<br>4.00 x 10 <sup>2</sup> ;<br>6.50 x 10 <sup>2</sup>                                                                | 2.10 x 10 <sup>3</sup> ;<br>1.65 x 10 <sup>3</sup> ;<br>1.70 x 10 <sup>3</sup>                                                                  |

717
